1 **Convergent clonal selection of donor- and recipient-derived CMV-specific T cells**  
2 **in hematopoietic stem cell transplant patients**

3

4 Jami R. Erickson<sup>a,b</sup>, Terry Stevens-Ayers<sup>a</sup>, Florian Mair<sup>a</sup>, Bradley Edmison<sup>a</sup>, Michael  
5 Boeckh<sup>a,c</sup>, Philip Bradley<sup>d,\*</sup>, Martin Prlic<sup>a,b,\*</sup>

6 a. Vaccine and Infectious Diseases Division, Fred Hutchinson Cancer Research Center, Seattle, WA,  
7 USA

8 b. Department of Global Health, University of Washington, Seattle, WA, USA

9 c. Clinical Research Division, Fred Hutchinson Cancer Research Center, Seattle, WA, USA

10 d. Public Health Sciences Division, Fred Hutchinson Cancer Research Center, Seattle, WA, USA

11

12 Co-Corresponding Authors:

13 Martin Prlic

14 1100 Fairview Ave N, Seattle, WA 98109

15 206-667-2216, [mprlic@fredhutch.org](mailto:mprlic@fredhutch.org)

16

17 Philip Bradley

18 1100 Fairview Ave N, Seattle, WA 98109

19 206-667-7041, [pbradley@fredhutch.org](mailto:pbradley@fredhutch.org)

20

21 Classification: Major: Biological Sciences. Minor: Immunology and Inflammation.

22 Keywords: T cell competition, cytomegalovirus, hematopoietic stem cell transplant

23 **Abstract (250 words)**

24 Competition between antigen-specific T cells for peptide:MHC (p:MHC) complexes shapes the  
25 ensuing T cell response. Mouse model studies provided compelling evidence that competition  
26 is a highly effective mechanism controlling the activation of naïve T cells. However, assessing  
27 the effect of T cell competition in the context of a human infection requires defined pathogen  
28 kinetics and trackable naïve and memory T cell populations of defined specificity. A unique  
29 cohort of non-myeloablative hematopoietic stem cell transplant (nmHSCT) patients allowed us  
30 to assess T cell competition in response to CMV reactivation, which was documented with  
31 detailed virology data. In our cohort, HSCT donors and recipients were CMV-seronegative and  
32 -positive, respectively, thus providing genetically distinct memory and naïve T cell populations.  
33 We used single-cell transcriptomics to track donor versus recipient-derived T cell clones over  
34 the course of 90 days. We found that donor-derived T cell clones proliferated and expanded  
35 substantially following CMV-reactivation. However, for immunodominant CMV epitopes,  
36 recipient-derived memory T cells remained the overall dominant population. This dominance  
37 was maintained despite more robust clonal expansion of donor-derived T cells in response to  
38 CMV reactivation. Interestingly, the donor-derived T cells that were recruited into these  
39 immunodominant memory populations shared strikingly similar TCR properties with the  
40 recipient-derived memory T cells. This selective recruitment of identical and nearly identical  
41 clones from the naïve into the immunodominant memory T cell pool suggests that competition  
42 does not interfere with rejuvenating a memory T cell population, but results in selection of  
43 convergent clones to the memory T cell pool.

44

45

46 **Significance (120 words)**

47 An existing memory T cell population specific for a single epitope is sufficient to effectively  
48 curtail responses to any new antigens if the original epitope is present in a vaccination regimen  
49 or heterologous infections. We asked if T cell competition precludes recruitment of any new,  
50 naïve T cells to an existing memory T cell pool in context of CMV-specific T cell responses in a  
51 cohort of transplant patients. Our data indicate that competition does not prevent recruitment  
52 of naïve T cells into the memory T cell pool, but selects for T cells with nearly or fully congruent  
53 T cell receptor specificities. We discuss the implications of rejuvenating a memory T cell pool  
54 while preserving the T cell receptor repertoire.

55

## 56 Introduction

57 The human T cell compartment is estimated to contain  $10^{12}$  cells (1). This T cell  
58 compartment consists of clonally expanded memory T cells and a pool of naïve T cells with an  
59 estimated  $\sim 10^8$  unique TCR $\beta$  chains (1). Competition between different T cell populations for  
60 resources and niches has been studied for nearly 50 years (2). With the development of the  
61 p:MHC tetramer and TCR transgenic mouse models, assessing competition between different T  
62 cell populations for a given p:MHC epitope has become more nuanced in the past 20 years (3-  
63 5). Initial observations focused on T cell responses against alloantigens in a transplant context  
64 (2, 6, 7), while subsequent studies examined competing T cell responses during infections or  
65 mimicking infection-like scenarios by using peptide-pulsed antigen-presenting cells (APCs) (8,  
66 9). T cell fitness and competition are shaped by TCR affinity for p:MHC, the T cell precursor  
67 frequency, and even epitope-independent cross-competition (3, 10, 11). In cross-competition, T  
68 cells compete for access to APCs instead of just their specific p:MHC (3, 9). Cross-competition  
69 does not appear to occur in all infections (12), but the mechanisms that control the extent of  
70 cross-competition remain poorly defined. Of note, a memory T cell population specific for just  
71 one single epitope can very effectively limit *de novo* T cell responses to other epitopes present  
72 in a subsequent heterologous infection or vaccine boost scenario as reported using different  
73 mouse model systems (4, 5). Similar findings were reported in a human study with a cohort that  
74 was suitable to examine the effects of T cell competition (13). In this latter study, Frahm and  
75 colleagues found that pre-existing T cell memory to adenovirus serotype 5 (Ad5) could  
76 substantially limit the response to HIV-derived epitopes delivered by an Ad5-vectored HIV  
77 vaccine (13).

78 Addressing T cell competition in human cohorts is challenging as it requires distinction  
79 between memory T cell responses versus *de novo* responses in context of a well-defined priming  
80 event. Furthermore, it requires strong T cell responses so analysis of a limited number of T cells

81 from the peripheral blood is sufficient to detect antigen-specific T cell clones. One of the  
82 strongest and best characterized human T cell responses occurs in response to cytomegalovirus  
83 (CMV) infection. Given that T cell responses to the immunodominant CMV proteins pp65 and IE1  
84 can be found in most CMV-seropositive individuals (14-19), we reasoned that assessing T cell  
85 competition for pp65- and IE1-derived epitopes could be feasible. To study competition, we  
86 examined cryopreserved peripheral blood mononuclear cells from patients undergoing a non-  
87 myeloablative hematopoietic stem cell transplant (nmHSCT) with concomitant monitoring for  
88 CMV reactivation. Importantly, an nmHSCT preserves a substantial amount of the patient's  
89 immune system compared to conventional HSCTs (20-22). Although CMV-seropositive  
90 individuals are highly prevalent (23), we identified a small cohort of nmHSCT patients with CMV-  
91 seronegative donors. Given that recipient and donor cells are genetically distinct, samples from  
92 this cohort represent a unique opportunity to measure competition between recipient-derived  
93 CMV-specific memory T cells and donor-derived naïve T cells. To simultaneously distinguish  
94 donor- and recipient-derived cells, and assess T cell repertoire and specificity, we utilized single-  
95 cell transcriptomics, ex vivo stimulation assays and computational analysis approaches. Overall,  
96 we found that T cells specific for CMV immunodominant epitopes remained predominantly  
97 recipient-derived, while clonal expansion following CMV reactivation was mainly driven by  
98 donor-derived T cells. We also observed that donor-derived T cells were not excluded from  
99 entering the immunodominant (pp65 and IE-1) CMV-specific memory CD8+ T cell pool. Finally,  
100 some donor-derived T cell clones showed stunning similarities in TCR  $\alpha$  and  $\beta$  V(D)J usage  
101 including highly conserved (and in one instance even identical at the amino acid level) CDR3  
102 regions with the recipient-derived memory T cell pool. Overall, our data suggest that the  
103 recipient-derived, CMV-specific memory T cell pool is quickly rejuvenated by newly recruited  
104 donor-derived clones. We discuss basic immunology implications as well as clinical relevance  
105 of our findings.

## 106 **Results**

### 107 *Patient cohort, sample processing and virology data*

108 To study competition between memory and naïve T cells for the same antigen, we obtained  
109 longitudinal samples from patients who underwent nmHSCT (**Figure 1A**). The patients were  
110 selected based on the following criteria: 1) recipients were CMV seropositive; 2) donors were  
111 CMV seronegative, allowing us to track the naïve T cell response to CMV; 3) both donors and  
112 recipients expressed the HLA-A\*02:01 allele, allowing us to identify CMV-specific CD8+ T cells  
113 using published TCR sequences and a p:MHC tetramer (epitope NLVPMVATV from CMV); and  
114 4) CMV reactivation occurred between 30 and 90 days after transplant. Following nmHSCT, each  
115 of the four patients underwent regular peripheral blood draws and weekly CMV surveillance by  
116 PCR (24). Blood draws were used to assess white blood cell (WBC) counts and processed to  
117 cryopreserve peripheral blood mononuclear cells (PBMCs) (**Figure 1B**). Cryopreserved PBMCs  
118 from each patient at three different time points - days 30, 60 and 90 post nmHSCT (red lines  
119 indicate PBMC draws that were used for each patient, **Figure 1C**) - were run through our single  
120 cell analysis pipeline. This pipeline included assays to determine cellular phenotypes,  
121 transcriptional profiles, T cell receptor (TCR) sequences and TCR specificities. We utilized  
122 transcriptional and machine learning analysis, such as TCRDist (25), to determine how clonal  
123 populations respond to CMV reactivation over time and predict shared epitope specificity of  
124 distinct clones. Finally, detailed virologic data were collected for each patient (**Figure 1C**).  
125 Patients 1, 2 and 4 had CMV reactivation events between days 60 and 90. Patient 3 had a CMV  
126 reactivation event between days 30 and 60 (**Figure 1C**).

127

### 128 *Immune compartment composition of the nmHSCT cohort on days 30, 60 and 90 post transplant*

129 First, we established baseline values of the immune compartment in our patient cohort by  
130 evaluating the nmHSCT recipients prior to CMV reactivation. Using hematology reports and flow

131 cytometry data, we calculated absolute numbers of white blood cells, T cells, and CD8+ T cells  
132 for each patient (**Figure 2A**). In three of the four patients, the number of both T cells and CD8+  
133 T cells increased over time. While patient 2 had decreasing absolute numbers of T cells over  
134 time, all patients had an increase in the percentage of T cells (**Figure 2B**).

135 In order to assess competition between memory and naïve T cells for the same p:MHC, we  
136 needed to delineate recipient cells from donor cells in the nmHSCT patients. First, we attempted  
137 to do this by examining sex-linked gene expression from our single-cell RNA sequencing  
138 (scRNA-seq) data as three out of four of the patients (1, 2, and 4) received sex-mismatched  
139 transplants (**Figure 1A**). In particular, we utilized expression of two genes: the male specific  
140 *RPS4Y1* (a Y chromosome-linked ribosomal protein) and the female specific *XIST* (a long non-  
141 coding RNA used for X chromosome inactivation). Both *RPS4Y1* and *XIST* transcripts could be  
142 found in Patient 2 and 4, allowing us to use sex-mismatched transplants to differentiate donor  
143 from recipient in these patients (**Figure 2C**). However, due to low detection and high dropout  
144 rates inherent in scRNA-seq (26-28), the vast majority of cells were of undetermined origin  
145 (**Figure 2C**, blue bars). Of note, patient 1 was male, but had undergone a previous HSCT  
146 procedure and we could not detect any *RPS4Y1*-expressing (recipient-derived) T cells in this  
147 patient. Further, patient 3 of our cohort had a sex-matched donor and recipient. In an effort to  
148 improve donor vs. recipient identification, we used single nucleotide polymorphisms (SNPs)  
149 within the scRNA-seq data to differentiate donor from recipient cells. SNP analysis had already  
150 been conducted on patient 3 (29), which allowed us to match SNPs in our scRNA-seq data to  
151 these previously acquired data and define donor vs. recipient. To resolve recipient and donor  
152 within patients 2 and 4, we utilized the scRNA-seq data to find SNPs (N=823 and 700 for patients  
153 2 and 4, respectively) within the transcripts for each cell. We employed these identified SNP  
154 markers to assign each cell one of two different genotypes (-1 or 1). Once each cell was assigned  
155 a genotype, we then designated recipient or donor by using sex-linked gene expression for each

156 genotype (**Figure 2D**). Together, this allowed us to observe the contribution of recipient and  
157 donor to the CD8<sup>+</sup> T cell compartment (**Figure 2E**). Overall, each patient contained proportionally  
158 more donor than recipient-derived CD8<sup>+</sup> T cells (**Figure 2E**).

159

160 *Assessing the presence of donor and recipient-derived pp65:A02:01-specific T cells*

161 As a first step, we wanted to ensure that we could indeed detect CMV-specific CD8<sup>+</sup> T cell  
162 responses in all 4 patients. We used a p:MHC tetramer to identify CD8<sup>+</sup> T cells that were specific  
163 for the immunodominant pp65 peptide NLVPMVATV presented in the context of HLA-A02:01 for  
164 all 4 patients. We detected pp65:A02:01-specific T cells in all 4 patients across all 3 time points  
165 (**Fig. 3A**). We next asked whether any of these pp65:A02:01-specific T cells were donor-derived  
166 by day 90. To address this, we sorted pp65:A02:01-specific T cells and then analyzed the sorted  
167 cells using 3' scRNA-seq to determine whether each cell originated from the donor or recipient  
168 as described above. We found that 90 days after nmHSCT, the vast majority of pp65:A02:01-  
169 specific T cells were still recipient-derived in patients 2 and 3 (**Fig. 3B**), despite the majority of  
170 the immune compartment being donor-derived. Of note, patient 1 had more pp65:A02:01<sup>+</sup> T  
171 cells that were donor-derived, but since this patient had undergone a transplant procedure prior  
172 to the nmHSCT, the vast majority of the immune compartment was donor-derived (**Fig. 2E**). Due  
173 to a technical issue, we only interrogated a fairly limited population of pp65:A02:01<sup>+</sup> T cells of  
174 Patient 4 in our scRNA-seq analysis (**Fig. 3B**).

175 Overall, these data indicate that the cohort is suitable to examine T cell competition and also  
176 provide a first line of evidence that although T cell competition appears to occur, it is permissive  
177 and allows for the recruitment of new T cell clones from the donor-derived, antigen-naïve T cell  
178 population.

179

180 *Assess clonal expansion in the CD8<sup>+</sup> T cell compartment*



181 After establishing that the cohort is suitable to address competition, we first wanted to determine  
182 how many expanding T cell clones we could detect in the entire CD8 T cell compartment. We  
183 reasoned that assessing expanding TCR clones would provide a general overview of the CD8+  
184 T cell dynamics, which was needed as a reference to subsequently assess and interpret CMV-  
185 specific T cell responses.

186 To accomplish this, we performed 5' scRNA-seq on CD8+ T cells to acquire VDJ and  
187 transcriptome data, followed by identifying TCR clones that expand over time (**Fig. 4A**). Note  
188 that this CD8 T cell population did not contain any pp65:A02:01 tetramer+ T cells, since these  
189 cells were sorted and analyzed separately (**Fig. 3B**). We defined “expanding clones” as having  
190 2-fold more cells than the previous timepoint and having at least 10 cells at any time point. We  
191 observed that the majority of these expanding clones were donor-derived (**Fig. 4A**). We next  
192 quantified the fold change in frequency of these expanding clones between day 60 and 90 and  
193 we observed that donor-derived expanding clones had an ~10-fold increased rate of fold  
194 expansion compared to recipient-derived clones (**Fig. 4B**). Together, these data indicate that  
195 clonal expansion is dominated by donor-derived T cells, which also appear to expand more  
196 vigorously. We next wanted to estimate the number of cell divisions that occurred within each  
197 donor-derived expanding clone. We first determined the relative abundance of each expanding  
198 clone within the CD8+ T cell compartment using our scRNA-seq data. We used the flow  
199 cytometry data and the absolute WBC numbers from each patient’s hematology reports to  
200 extrapolate the absolute numbers of each clone per mm<sup>3</sup> blood. Assuming an average of 5L of  
201 blood per person and assuming each CD8+ T cell clone was only present as a single cell at the  
202 time of priming, we found that on average, expanding clones would undergo nearly 24 rounds  
203 ( $\pm 1.56$  standard deviation) of cell division (**Fig. 4C**). The number of rounds of cell division was  
204 calculated by determining absolute numbers, then determining the number of doubling events  
205 that would occur to lead to that number of cells. The clones that were included were considered

206 'expanding clones', and had zero clones detected at day 30 post-transplant. Although this  
207 number may be an overestimate if the single clone progenitor assumption is incorrect, it indicates  
208 that clonal expansion was robust and did not appear to be stifled by mechanisms related to  
209 competition or cross-competition.

210

211 *Additional CD8+ T cell clonal analysis reveals the presence of stable, expanding and contracting*  
212 *clones*

213 We next wanted to better define the overall dynamics of CD8+ T cell clone abundance and  
214 determine the relative abundance of expanding, stable and contracting clones. First, we  
215 examined the trends of all CD8+ T cell clones over time. To do this, we plotted each clone that  
216 had at least five cells per clone for each time point (**Fig. 5A**). We then separated each of the  
217 clones by behavior, with four different behaviors: 1) clones that expanded at 60 days post-  
218 transplant, 2) clones that expanded at 90 days post-transplant, 3) clones that contracted, and 4)  
219 clones that remained stable over time. Our criteria for clones that expanded at 60 days post-  
220 transplant were that the clone must have had at least five cells at one time point and the number  
221 of cells at day 60 had to be twice the number of cells at day 30. We found that each patient had  
222 clones that expanded at day 60, but the majority of the clones which expanded at day 60 were  
223 recipient derived clones from patient 3. In contrast, the majority of clones which expanded at  
224 day 90 were donor-derived. Contracting clones were defined as those clones which decreased  
225 two-fold between any two time points and had at least 5 cells at any time point. Clones that were  
226 considered stable had at least 5 cells at any time point and did not vary by more than two-fold  
227 at any time point.

228 To further illustrate how the frequencies of each clone changed over time, we used frequency  
229 maps of the clones from each patient with donor-derived clones shown in the top row and  
230 recipient-derived clones in the bottom row (**Fig. 5B**). We found that all patients contained at least

231 some donor-derived clones that reached peak frequency at 90 days post-nmHSCT. In contrast,  
232 most recipient-derived clones remained stable or contracted over time, although some recipient-  
233 derived clones from patient 3 reached peak frequency at either 60- or 90-days post-nmHSCT,  
234 respectively. Overall, these data further highlight that clonal expansion is predominantly  
235 observed in the donor-derived T cell population.

236

237 *Expanding clones have similar transcriptional profiles regardless of donor or recipient origin*

238 Although most expanding clones were of donor origin, some expanding T cells were recipient-  
239 derived clones. We next wanted to assess if donor- and recipient-derived expanding T cells had  
240 congruent or distinct transcriptional programs. We considered that transcriptional differences  
241 could result from distinct epitope specificity, distinct cell origin (donor vs. recipient) and  
242 differentiation status at the time of activation (naïve vs. memory). We examined how  
243 transcriptional profiles change over time by focusing on clones (either donor-derived, or  
244 recipient-derived) that expanded at 90 days post-nmHSCT. To visualize gene expression  
245 changes for these single cell data, we used uniform manifold approximation and projection  
246 (UMAP) (30). CD8+ T cells were then placed into clusters identified by a shared nearest neighbor  
247 modularity optimization-based clustering algorithm. Each clone was visualized on the CD8+ T  
248 cell UMAP at each time point, and each cell within that clone was colored by cluster (**Fig. 6A**).  
249 Note, that for patients 1 and 4 all plots shown are of donor origin. In general, the clones which  
250 expanded at 90 days post-nmHSCT occupied the same five clusters in the UMAP, which are  
251 displayed as green, blue, brown, purple and red. This pattern could be observed regardless if  
252 clones were donor- or recipient-derived indicating a shared transcriptional phenotype. We used  
253 singleR to perform cell type calling (31), which suggested that cells occupying these clusters  
254 featured an effector memory CD8+ T cell phenotype. There was a unique phenotype seen in  
255 some recipient-derived clones of patient 3 that occupied an “orange” cluster that fell into a

256 distinct spatial region and contains a transcriptome suggestive of a terminal effector phenotype  
257 (based on singleR designation). Overall, these data suggest that T cell clones which expanded  
258 at 90 days post-nmHSCT had a similar transcriptional profile, regardless of epitope specificity  
259 or donor vs. recipient origin. Of note, these expanding clones share the same transcriptional  
260 space even across patients. The main characteristics of this transcriptional profile as  
261 characterized by gene ontology analysis include “effector molecules” (including *GZMH*, *GZMB*,  
262 *IFNG*), “TCR mediated signaling” (including *CD3D*, *LCK*, *LAG3*), and “memory T cell formation”  
263 (including *ZEB2*, *CCL5*, *LGALS1*).

264

### 265 *Exploring CMV-specific T cell responses*

266 We next wanted to examine if we could identify CMV-specific T cells within these expanding  
267 clones. To achieve this, we needed to expand our analysis to T cells beyond those that we  
268 already identified by pp65 peptide (NLVPMVATV) loaded HLA-A\*02:01 tetramers. As an overall  
269 strategy, we used a combination of searching for previously published sequences, identifying  
270 CMV-specific T cells in ex vivo stimulation experiments and using TCRdist analysis to assign  
271 CMV-specificity to TCR clones.

272 First, we compared the V(D)J full chain sequences of clones from our cohort to previously  
273 published V(D)J sequences of CMV-specific CD8<sup>+</sup> T cells (32). We identified 15 clones in our  
274 cohort with sequences that had been previously described as being CMV-specific (9 recipient-  
275 derived, 6 donor-derived) (**Fig. 7A**).

276 Second, to identify additional CMV-specific T cell receptors, we stimulated T cells from patient  
277 3 using overlapping peptide pools from two CMV proteins: pp65 and IE-1. We chose patient 3  
278 given the high abundance of pp65:A02:01-specific T cells (**Fig. 3A**) and reasoned that this would  
279 likely yield the highest number of new CMV-specific TCR specificities. PBMC were incubated  
280 with either dimethyl sulfoxide (DMSO, carrier control), pp65 peptide pool, or IE-1 peptide pool

281 for 18 hours (**Fig. 7B**). Following incubation, we used CD137 as a surrogate marker for  
282 responding, antigen specific T cells (33). We used flow cytometry to sort the following  
283 populations after stimulation: CD137-CD8<sup>+</sup> T cells (DMSO), CD137<sup>+</sup>CD8<sup>+</sup> T cells (pp65 peptide  
284 pool), and CD137<sup>+</sup>CD8<sup>+</sup> T cells (IE-1 peptide pool). Each sorted population was then analyzed  
285 by 5' scRNA-seq to determine the V(D)J sequences. Of note, CD8<sup>+</sup> T cells that were treated with  
286 either peptide pool expressed more effector molecule transcripts compared to DMSO treated  
287 controls (**Supp. Fig. 1A**). Sequencing of the CD137<sup>+</sup>CD8<sup>+</sup> T cells from the pp65 stimulation  
288 conditions identified 27 clones. Similarly, 14 clones were identified by sequencing CD137<sup>+</sup>CD8<sup>+</sup>  
289 T cells from the IE-1 peptide pool stimulation. We compared the TCR sequences of these new  
290 clones to the original longitudinal patient 3 samples (**Supp. Fig. 1B**). Out of these 41 new clones,  
291 we found five clones that were also present in our initially generated *ex vivo* data set (**Fig. 7C**).  
292 One of the clones was specific for a pp65-derived epitope and the other four clones were specific  
293 for IE-1-derived epitopes. We did not expect a complete overlap between these datasets given  
294 that the sampling itself is inherently limited (number of T cells sequenced in each experiment as  
295 a snapshot of the entire CD8 repertoire), but we were initially surprised by this rather limited  
296 congruence. However, since we did not sequence pp65:A02:01-specific T cells in our initial  
297 experiment (since the tetramer<sup>+</sup> CD8 T cells were sequenced separately), the low number of  
298 pp65:MHC-I-specific clones could indicate that most pp65-specific T cells are truly  
299 pp65(NLVPMVATV):A02:01-specific. Finally, of the five pp65- and IE1-specific clones identified,  
300 only two clones met our criteria for expanding clones, and both of those clones expanded from  
301 day 30 to day 60 post-transplant, which aligns with the CMV reactivation kinetics for donor 3  
302 (between day 30 and 60).

303 We next determined recipient and donor contribution of both pp65:MHC-I and IE-1:MHC-I  
304 specific CD8<sup>+</sup> T cells. CD137<sup>-</sup> CD8<sup>+</sup> T cells (DMSO control) were mostly donor derived (723  
305 recipient cells and 1375 donor cells, **Fig. 7C**), and yielded a comparable donor to recipient

306 distribution as initially observed in **Fig. 2E**. However, pp65 or IE-1-specific T cells had an  
307 increased frequency of recipient cells similar to our observation with the  
308 pp65(NLVPMVATV):A02:01-tetramer (**Fig. 7D vs. 3B**). IE-1-specific T cells were ~51% recipient-  
309 derived (25 recipient cells and 24 donor cells) and pp65-specific T cells were mostly recipient-  
310 derived (142 recipient cells and 20 donor cells). Taken together, these data highlight that some  
311 epitope-specific competition does appear to occur and is more stringent for pp65-specific T  
312 cells compared to IE-1-specific T cells.

313

314 *Some donor and recipient-derived clones have nearly to fully identical TCR properties*

315 Finally, we wanted to assess how similar (in re. to TCR usage and transcriptome) newly recruited,  
316 CMV-specific T cells were compared to the recipient-derived memory population. We found 21  
317 donor – recipient clone pairs with a statistically significant degree of TCR similarity. One of these  
318 pairs, specific for CMV IE-1, had identical TCR  $\alpha$  and  $\beta$  chains including identical CDR3 regions  
319 on the amino acid level, while still differing on the nucleotide level as one would expect (**Fig. 8A**).  
320 We compared the transcriptome of these identical TCR clones and found that the recipient-  
321 derived clones had more of an effector-like phenotype (granulysin<sup>hi</sup>, NKG7<sup>hi</sup>, but CD27<sup>lo</sup>; **Fig. 8A**).  
322 Of note, as a trend, donor-derived T cells were expanding, while recipient-derived T cells  
323 appeared stable in abundance. Thus, a comparison at the TCR level reveals transcriptional  
324 heterogeneity and differences that were not necessarily apparent when examining all expanding  
325 clones (**Fig. 6A**). These transcriptional differences appeared to be independent of the TCR, but  
326 instead depended on the T cell's differentiation status. Finally, patient 4 had 8 donor – recipient  
327 clone pairs specific for HLA-B\*35:01- IPSINVHHY. The donor-derived clones surpassed the  
328 recipient derived clones in abundance by day 90 in all of these pairs, indicating that the donor-  
329 derived clones have an advantage that is likely to be independent of the TCR.

330

331 **Discussion**

332 We analyzed clonal T cell expansion in a unique set of longitudinal PBMC samples from patients  
333 treated with minimal myeloablative conditioning and HSCT. Following nmHSCT, patients  
334 harbored two populations of genetically unique T cells, derived from the recipient or donor. In  
335 our cohort, all recipients were CMV seropositive and hence the recipient-derived T cell  
336 compartment contained CMV-specific memory T cells. In contrast, all donors were CMV  
337 seronegative and we thus considered the donor-derived T cell compartment to be antigen-naïve.  
338 This notion is also supported a lack of donor-derived CMV-specific clones until after CMV  
339 reactivation occurred. Of note, donor and recipient pairs were not fully HLA-matched, but all  
340 donors and recipients expressed the HLA-A\*02:01 allele. This is important, because it allowed  
341 us to interpret our data in context of HLA-A\*02:01-restricted, naïve and memory competing T  
342 cell responses. Overall, we found that lymphocyte numbers were typically stable for the first 90  
343 days following nmHSCT for 3 of the 4 patients indicating that homeostatic expansion during that  
344 time period was not a major driver of T cell proliferation in these patients. Furthermore, the donor-  
345 derived T cells were the predominant population in the overall CD8+ T cell compartment.

346 In an effort to reveal the overall clonal dynamics of the CD8+ T cell compartment, we first  
347 assessed when and how many CD8+ T cells expanded. We used a rather stringent definition of  
348 expansion which was defined as a 2-fold increase of a clone between 2 time points with at least  
349 10 cells at any time point. This analysis revealed that expanding T cells were predominantly of  
350 donor origin and arose specifically following CMV reactivation. Although we did observe clonal  
351 expansion of recipient-derived T cells, donor-derived T cell clones expanded more vigorously. If  
352 we assume that each donor-derived clone started from a single naïve progenitor (as opposed to  
353 a small population of memory-like, homeostatically expanded T cells), then each clone would  
354 undergo approximately 24 rounds of cell division. The number of cell divisions also aligns with  
355 studies evaluating T cell expansion in mice, where a brief antigen encounter is sufficient to induce

356 7-10 rounds of cell division by naïve CD8+ T cells (34, 35). Prolonging the duration of TCR  
357 stimulation beyond a brief activating encounter will drive additional rounds of cell division for  
358 CD8+ T cells (34). Further mouse studies indicate that a single naïve antigen-specific T cell can  
359 generate an effector population of  $\sim 10^4$  T cells in context of an acute bacterial infection,  
360 indicating at least 14 rounds of cell division (36). This robust clonal expansion of donor-derived  
361 T cells following CMV reactivation indicates that effective clonal expansion still occurred despite  
362 the presence of recipient-derived CMV-specific memory T cells.

363 To specifically identify CMV-specific T cell responses in the CD8 T cell compartment, we  
364 used a combination of previously published TCR sequences and, for patient 3, ex vivo  
365 stimulation with pp65 and IE-1 peptide pools. We focused on these immunodominant epitopes  
366 to ensure that we could reliably detect antigen-specific T cells despite the inherent numeric  
367 limitations of sampling the T cell compartment with currently available single-cell sequencing  
368 based approaches (that allow for sequencing of  $\sim 10^3$ - $10^4$  T cells per run). While the overall CD8+  
369 T cell compartment consisted of  $\sim 50$ - $75\%$  donor-derived T cells (from CMV seronegative  
370 donors), strikingly the pp65-specific T cell response was heavily dominated by recipient-derived  
371 memory T cells. However, the efficiency of competition appeared to be epitope-dependent as  
372 we observed a more pronounced donor contribution to the IE-1-specific T cell population  
373 compared to the pp65-specific T cell population - the IE-1 specific T cell response had  
374 essentially equal contributions of donor and recipient-derived T cells. These data highlight that  
375 an existing memory T cell population does not prevent *de novo* T cell responses of the same  
376 specificity. CMV-specific donor-derived T cells appear to have a competitive advantage over  
377 recipient-derived T cells, which could be related to the more terminally differentiated phenotype  
378 of the recipient-derived T cells. However, we cannot formally rule out that the condition regimen  
379 and/or graft versus host disease prophylaxis treatment (outlined in the Methods section) affected



380 T cell function or clonal selection. Potential treatment-mediated effects are inherent confounders  
381 for which we cannot control in our study.

382 Remarkably, some of the newly recruited donor-derived T cells were highly similar to  
383 CMV-specific recipient clones. When comparing all donor- vs. recipient-derived clones, we  
384 observed additional instances of stunning TCR similarity, including a donor- and recipient-  
385 derived pair with fully identical TCR sequences on the amino acid level (but still showing  
386 differences on the nucleotide level). Together, these data suggest that the selection process that  
387 allows for T cell expansion is highly reproducible in humans, similar to previous observations in  
388 a mouse model system (37). Of note, the donor-derived T cells were the more abundant clones  
389 in most of the highly similar, 21 donor – recipient clone pairs indicating that the donor-derived T  
390 cells have a competitive advantage that is unrelated to TCR specificity. Transcriptome analysis  
391 of these donor-derived clones indicates that they may be more sensitive to co-stimulation (CD27)  
392 and less terminally differentiated (KLRG1, NKG2C), which may provide the observed competitive  
393 advantage (38, 39).

394 Finally, clonal expansion coincided with CMV reactivation, but it is possible that some of  
395 the donor-derived expanding clones were alloreactive and not CMV-specific. In nmHSCT  
396 patients, donor-derived alloresponses are essential to eliminate recipient-derived blood  
397 malignancies, but can also cause graft versus host disease (GvHD). We attempted to determine  
398 if any expanding donor-derived clones had distinct transcriptional profiles that could potentially  
399 help to discern allo- from CMV-specific responses, but we could not detect any signatures to  
400 potentially delineate these responses.

401 Overall, our study shows that CMV reactivation is sufficient to elicit strong *de novo* T cell  
402 responses despite the presence of CMV-specific memory T cells. We furthermore observed  
403 remarkable T cell receptor similarity between clonally expanded donor- and recipient-derived T  
404 cells suggesting reproducible selection of T cell clones with congruent T cell receptor

405 specificities, which overall appears to lead to a rejuvenation of the memory T cell pool without a  
406 pronounced change in the TCR repertoire.

407 **Acknowledgements and funding sources**

408 We thank Nicholas J. Maurice for critical review of the manuscript, and David Levine for  
409 assistance with genotyping patient 3. This work was supported by National Institutes of Health  
410 (NIH) grants R01AI123323 (to M.P.). J.R.E. was supported by NIH T32 AI007509. P.B. was  
411 supported by R01AI136514 and ORIP S10OD028685 to support Fred Hutch Scientific  
412 Computing. The sample repository was supported by the Fred Hutch Vaccine and Infectious  
413 Disease Division.

414

415 **Figure Legends**

416 **Figure 1: Overview of the patient cohort, the experimental design and collected virology**

417 **data.** (A) Patient cohort details for each recipient and donor pair. (B) Overview of our  
418 experimental strategy. PBMCs: Peripheral blood mononuclear cells. scRNA-seq: single-cell  
419 RNA-sequencing. (C) Cytomegalovirus (CMV) load over time for each patient. IU/mL:  
420 international units per mL of CMV. Red line indicates blood draws that scRNA-seq was  
421 performed.

422

423 **Figure 2: Immune compartment composition of the nmHSCT cohort on days 30, 60 and 90**

424 **post transplant.** (A) Absolute number of leukocytes, T cells, and CD8<sup>+</sup> T cells per mm<sup>3</sup> for each  
425 patient over time. Grey bars represent the average of all patients. (B) Percentage of T cells of  
426 live PBMCs over time for each patient. Grey bars represent the average of all patients. (C)  
427 Stacked-bar plot representing the number of CD8<sup>+</sup> T cells that are RPS4Y1<sup>+</sup>, XIST<sup>+</sup>, or  
428 undetermined (either RPS4Y1<sup>-</sup> XIST<sup>-</sup> or RPS4Y1<sup>+</sup> XIST<sup>+</sup>) in each patient. (D) Each cell was called  
429 for a genotype (either -1 or 1) based on single nucleotide polymorphisms. Then sex-linked gene  
430 expression was assessed for each genotype to determine which genotype belonged to recipient  
431 and donor. (E) Stacked-bar plot of CD8<sup>+</sup> T cells for each patient displaying the frequency of  
432 recipient and donor cells.

433

434

435 **Figure 3: CMV-specific T cells are present in all 4 patients.** (A) Frequency of HLA-A2 NLV

436 tetramer-specific T cells in each patient on days 30, 60 and 90. Grey bars represent the average

437 of all patients. (B) Overview of workflow to determine CMV-tetramer<sup>+</sup> CD8<sup>+</sup> T cell origin. (C) A

438 table indicating the number of HLA-A2 NLV tetramer-specific CD8<sup>+</sup> T cells derived from recipient

439 or donor for patients 2-4 at 90 days post-transplant.

440

441 **Figure 4: Assessing general patterns of clonal expansion in the CD8+ T cell compartment**

442 (A) Plots indicating the number of cells within a CD8+ T cell clone over time, separated by clone  
443 origin. Left to right: (1) All Clones, (2) clones expanding at day 60 post-transplant, (3) clones  
444 expanding at day 90 post-transplant, (4) contracting clones, and (5) stable clones. (B) Fold-  
445 expansion of expanding donor- and recipient-derived clones is shown between day 60 and 90.  
446 (C) A calculated range of abundance for expanding clones in the blood.

447

448 **Figure 5. CD8 T cell compartment expansion and contraction dynamics** (A) The number of

449 total detected clones is shown (left panel) and then divided into expanding (day 30 to 60; day 60  
450 to 90), contracting and stable clones. (B) Frequency heat maps of clones separated by patient  
451 and clone origin. Each row represents one clone. The color represents the frequency of that  
452 clone at each time point post-transplant.

453

454 **Figure 6. Shared transcriptional signatures of expanding CD8 T cell clones** (A) UMAPs of

455 expanding clones from each patient. The color of the cell represents cluster identity. The grey  
456 UMAP indicates where other cells from each patient reside.

457

458 **Figure 7. Identification of CMV-specific CD8 T cell clones** (A) CMV-specific CD8 T cell clones

459 were identified based on previously published reports. The number of cells for each CMV-  
460 specific CD8 T cell clone is shown over time. Circle color indicates clonal specificity for a given  
461 peptide. Line color indicates which patient the clone is from.

462 (B) Experimental overview of stimulation assay. PBMCs from patient 3 at day 90 post-transplant

463 were stimulated with pp65 or IE-1 peptide pools for 18 hours. FACS-purified T cells were  
464 analyzed by scRNA-seq followed by V(D)J analysis was performed to determine CMV specific

465 V(D)J sequences. (C) CMV-specific CD8 T cell clones were identified in an ex vivo stimulation  
466 assay for patient 3 as shown in (B). The number of cells for each identified clone is plotted over  
467 time. Circle color indicates clonal specificity for a given peptide. (D) Frequency of donor and  
468 recipient cells is shown for the negative control (DMSO), the IE-1 peptide pool stimulation  
469 condition and the pp65 peptide pool stimulation condition.

470

471 **Figure 8. Donor- and recipient-derived T cells with identical or highly similar TCRs (A)**

472 Shown are the CDR3 amino acid and nucleotide sequences for a donor- and recipient-derived  
473 IE-1-specific T cell clone that expanded over time with the following TCR gene usage: TRAV8-  
474 6\*01, TRAJ30\*01, TRBV30\*01, TRBJ2-7\*01. The transcriptome of each detected clone is shown  
475 in a UMAP projection. Differentially expressed genes between donor- and recipient-derived  
476 clones are highlighted in the heatmap. (B) Shown are the CDR3 amino acid and nucleotide  
477 sequences for an IE-1 specific donor- and recipient-derived T cell clone that expanded over  
478 time with the following TCR gene usage: TRAV8-6\*01, TRAJ30\*01, TRBV30\*01, TRBJ2-7\*01.  
479 The transcriptome of each detected clone is shown in a UMAP projection. Differentially  
480 expressed genes between donor- and recipient-derived clones are highlighted in the heatmap.  
481 (C) Shown are the CDR3 amino acid and nucleotide sequences for a donor- and recipient-  
482 derived T cell clone with predicted shared antigen-specificity that expanded over time with the  
483 following TCR gene usage: TRAV17\*01, TRAJ33\*01, TRBV28\*01, TRBJ1-4\*01. The  
484 transcriptome of each detected clone is shown in a UMAP projection. Differentially expressed  
485 genes between donor- and recipient-derived clones are highlighted in the heatmap.

486

487 **Materials and Methods**

488 **Human Cohort and sample processing:**

489 This study was approved by the Fred Hutchinson Cancer Research IRB and all subjects signed  
490 informed consent. The patient cohort contained four recipient - donor pairs with CMV  
491 reactivation events between day 30 and 90 after transplantation each with the following clinical  
492 diagnosis prior to nmHSCT: Patient 1 was diagnosed with Myelodysplasia (recipient 68 years,  
493 donor 38 years; this was the patient's 2<sup>nd</sup> HSCT procedure); Patient 2 was diagnosed with  
494 Mantle Cell Lymphoma (recipient 60 years, donor 29 years); Patient 3 was diagnosed with  
495 acute lymphocytic leukemia (recipient 57 years, donor 55 years); Patient 4 was diagnosed with  
496 non-Hodgkin's lymphoma (recipient 60 years, donor 20 years). Patients received fludarabine  
497 and 200-300 cGy of total body irradiation for pretransplant conditioning. Peripheral blood stem  
498 cells served as the graft source. Patients 2, 3 and 4 received cyclosporine and mycophenolate  
499 mofetil (MMF) for GVH prophylaxis. Patient 1 was treated with sirolimus in addition to  
500 cyclosporine and MMF. CMV surveillance was done weekly by PCR and patients were  
501 preemptively treated with (val)ganciclovir as recently described (24). Peripheral blood  
502 mononuclear cells (PBMCs) from each patient and for each time point were obtained as  
503 cryopreserved samples from the Infectious Disease Sciences Biospecimen Repository, Vaccine  
504 and Infectious Disease Division, FHCRC. Vials with cryopreserved cells were thawed at 37°C  
505 until a tiny ice crystal was left in the tube, and then carefully diluted in 1mL of pre-warmed  
506 complete RPMI (RPMI (Gibco, #18875119) with 10% FBS (Nucleus Biologics, #AU FBS-500ml  
507 L1 HI) and 1% Penicillin-Streptomycin (Gibco, #15140122) and transferred to a new tube. An  
508 additional 13 mL of pre-warmed complete RPMI were added drop by drop, followed by  
509 centrifugation for 5 minutes at 400g and resuspension in 1 mL of complete RPMI.

510

511 **T cell stimulation assay**

512 Freshly thawed PBMCs were resuspended at  $10^7$  cells/mL. 100 $\mu$ L of cells were added into a 96-  
513 well round bottom plate. 50  $\mu$ L stimulation cocktail was added to each well containing cells.  
514 Stimulation cocktail was made by adding 1 $\mu$ g/mL of both anti-CD28 and anti-CD49d (BD  
515 Biosciences) with 2  $\mu$ g/mL of either overlapping peptide pools of pp65, IE-1 (pp65 and IE-1  
516 PepMix, JPT peptide technologies), or DMSO into complete RPMI. PBMCs with stimulation  
517 cocktail was incubated at 37°C for 18 hours. Cells were then prepared for FACS.

518

### 519 **Flow Cytometry and Cell sorting**

520 For flow cytometric analysis, good practices were followed as outlined in the guidelines for use  
521 of flow cytometry (40). Following thawing or stimulation, PBMCs were incubated with Fc-  
522 blocking reagent (BioLegend Trustain FcX, #422302) and fixable Aqua Live/Dead reagent  
523 (ThermoFisher, #L34957) in PBS (Gibco, #14190250) for 15 minutes at room temperature. If  
524 required, cells were stained with an CMV-Tetramer reagent (peptide NLVPMVATV; NIH Tetramer  
525 Core) diluted in FACS buffer (PBS with 2% FBS, Nucleus Biologics, #AU FBS-500ml L1 HI) for  
526 30 minutes at room temperature, followed by two washes. After this, cells were incubated for 20  
527 minutes at room temperature with 100  $\mu$ l total volume of antibody master mix freshly prepared  
528 in Brilliant staining buffer (BD Bioscience, #563794), followed by two washes. All antibodies were  
529 titrated and used at optimal dilution, and staining procedures were performed in 96-well round-  
530 bottom plates. Stained PBMCs were resuspended in FACS buffer and sorted.

531 All cell sorting was performed on a FACSAria III (BD Biosciences), equipped with 20 detectors  
532 and 405nm, 488nm, 532nm and 628nm lasers. For all sorts, an 85  $\mu$ m nozzle operated at 45 psi  
533 sheath pressure was used. Single-stained controls were prepared with every experiment using  
534 antibody capture beads diluted in FACS buffer (BD Biosciences anti-mouse, #552843 and anti-  
535 rat, #552844), or cells for Live/Dead reagent. Cells were sorted into chilled Eppendorf tubes



536 containing 500  $\mu$ L of complete RPMI, washed once in PBS and immediately used for subsequent  
537 processing.

538

539

#### 540 **Single-cell library preparation and sequencing**

541 cDNA libraries of CMV-Tetramer+ CD8+ T cells were generated using the Chromium Single Cell  
542 3' Reagent Kits v2 while CMV-Tetramer- CD8+ T cells and CD8+ stimulated T cells were  
543 generated using the Chromium Single Cell 5' Reagent Kits v1 with Human T cell V(D)J enrichment  
544 kits (10x Genomics). The Chromium Single Cell protocol targeting 10,000 cells per well was  
545 followed. Briefly, single cells were isolated into oil emulsion droplets with barcoded gel beads and  
546 reverse transcriptase mix. cDNA was generated within these droplets, then the droplets were  
547 dissociated. cDNA was purified using DynaBeads MyOne Silane magnetic beads (ThermoFisher,  
548 #370002D). cDNA amplification was performed by PCR (10 cycles) using reagents within the  
549 Chromium Single Cell 3' Reagent Kit v2 (10x Genomics). Amplified cDNA was purified using  
550 SPRIselect magnetic beads (Beckman Coulter). If necessary, target enrichment was also  
551 performed by PCR (10 cycles) and cDNA purification via SPRIselect beads. cDNA was  
552 enzymatically fragmented and size selected prior to library construction. Libraries were  
553 constructed by performing end repair, A-tailing, adaptor ligation, and PCR (12 cycles). Quality of  
554 the libraries was assessed by using Agilent 2200 TapeStation with High Sensitivity D5000  
555 ScreenTape (Agilent). Quantity of libraries was assessed by performing digital droplet PCR  
556 (ddPCR) with Library Quantification Kit for Illumina TruSeq (BioRad, #1863040). Libraries were  
557 diluted to 2 nM and paired-end sequencing was performed on a HiSeq 2500 sequencer (Illumina).  
558 Stimulation libraries were diluted to 3nM and paired-end sequencing was performed on a  
559 NovaSeq 6000 (Illumina).

560

561 **Sequencing Data Processing**

562 Raw base call (BCL) files were demultiplexed to generate Fastq files using the cellranger mkfastq  
563 pipeline within Cell Ranger 2.1.1 (10x Genomics). Targeted transcriptome Fastqs were further  
564 analyzed via Seven Bridges (BD Biosciences). Whole transcriptome Fastq files were processed  
565 using the standard cellranger pipeline (10x genomics) within Cell Ranger 2.1.1. Briefly, cellranger  
566 count performs alignment, filtering, barcode counting, and UMI counting. The cellranger count  
567 output was fed into the cellranger aggr pipeline to normalize sequencing depth between  
568 samples. The final output of cellranger (molecule per cell matrix) was then analyzed in R using  
569 the package Seurat (version 2.3 and 3.0) as described below.

570

571 **Sequencing analysis**

572 The R package Seurat (41) was utilized for all downstream analysis. For whole transcriptome  
573 data, based on commonly used cutoffs suggested by Butler et al, only cells that had at least 200  
574 genes (with  $\leq 20\%$  being mitochondrial genes) were included in analysis (removing 182 out of a  
575 total of 5,416 cells). A natural log normalization using a scale factor of 10,000 was performed  
576 across the library for each cell. UMIs and mitochondrial genes were linearly scaled to remove  
577 these variables as unwanted sources of variation. Doublets and low-quality cells were identified  
578 by their outlier UMI and gene counts on a per patient basis, and their high percentage of  
579 mitochondrial genes (more than 20%).

580 For whole transcriptome analysis (WTA), dimensionality reduction using UMAP and clustering  
581 was performed on a subset of variable genes. When scaling data, UMI was the only regressed  
582 variable. Dimensionality reduction using UMAP and clustering was based on either all genes or  
583 all proteins. For differential gene expression analysis we utilized the Seurat implementation of  
584 MAST (model-based analysis of single-cell transcriptomes) with the number of UMIs included

585 as a covariate (proxy for cellular detection rate (CDR)) in the model (42). To combine datasets,  
586 Harmony was used (43).  
587 Genotype-informative SNPs in single-cell transcripts were identified by correlation analysis of  
588 heterozygous positions across cells followed by clustering to define groups of covarying SNPs.  
589 Sex-specific gene expression (patients 2 and 4) and previous genotyping data (patient 3) were  
590 then used to disambiguate donor and recipient. Genotype calls at the single-cell level were  
591 compared with output from the Sourporcell algorithm (44) and found to be greater than 99%  
592 concordant. TCR sequence matching was performed using the TCRdist algorithm as  
593 implemented in the Clonotype Neighbor Graph Analysis (CoNGA) python package's  
594 `find_significant_tcrdist_matches` function (<https://github.com/phbradley/conga>) (45). In this  
595 approach, the TCRdist score for a match is compared to a background distribution of TCRdist  
596 scores for the same TCRs matched to random TCR sequences generated using a probabilistic  
597 model of the V(D)J recombination process.

598

#### 599 **DATA AND CODE AVAILABILITY**

600 The sequencing data discussed in this publication have been deposited in the NCBI's Gene  
601 Expression Omnibus (46) and are accessible through GEO series accession number GSE167825.  
602 (<https://www.ncbi.nlm.nih.gov/geo/query/acc.cgi?acc=GSE167825>). All scripts used for data  
603 processing and plot generation are available at [https://github.com/Jami-](https://github.com/Jami-Erickson/scRNAseq_CD8Tcells_CMV)  
604 [Erickson/scRNAseq\\_CD8Tcells\\_CMV](https://github.com/Jami-Erickson/scRNAseq_CD8Tcells_CMV).

605

606

607 **References**

- 608
- 609 1. Qi Q, *et al.* (2014) Diversity and clonal selection in the human T-cell repertoire. *Proc Natl Acad Sci U S A* 111(36):13139-13144.
  - 611 2. Liacopoulos P & Ben-Efraim S (1975) Antigenic competition. *Prog Allergy* 18:97-204.
  - 612 3. Kedl RM, Kappler JW, & Marrack P (2003) Epitope dominance, competition and T cell affinity maturation. *Curr Opin Immunol* 15(1):120-127.
  - 614 4. Oberle SG, *et al.* (2016) A Minimum Epitope Overlap between Infections Strongly Narrows the Emerging T Cell Repertoire. *Cell Rep* 17(3):627-635.
  - 615 5. Johnson LR, Weizman OE, Rapp M, Way SS, & Sun JC (2016) Epitope-Specific Vaccination Limits Clonal Expansion of Heterologous Naive T Cells during Viral Challenge. *Cell Rep* 17(3):636-644.
  - 619 6. den Haan JM, *et al.* (1995) Identification of a graft versus host disease-associated human minor histocompatibility antigen. *Science* 268(5216):1476-1480.
  - 620 7. Wallny HJ & Rammensee HG (1990) Identification of classical minor histocompatibility antigen as cell-derived peptide. *Nature* 343(6255):275-278.
  - 623 8. Grufman P, Wolpert EZ, Sandberg JK, & Kärre K (1999) T cell competition for the antigen-presenting cell as a model for immunodominance in the cytotoxic T lymphocyte response against minor histocompatibility antigens. *Eur J Immunol* 29(7):2197-2204.
  - 625 9. Kedl RM, *et al.* (2000) T cells compete for access to antigen-bearing antigen-presenting cells. *J Exp Med* 192(8):1105-1113.
  - 628 10. Zehn D, Roepke S, Weakly K, Bevan MJ, & Prlic M (2014) Inflammation and TCR signal strength determine the breadth of the T cell response in a bim-dependent manner. *J Immunol* 192(1):200-205.
  - 631 11. Badovinac VP, Haring JS, & Harty JT (2007) Initial T cell receptor transgenic cell precursor frequency dictates critical aspects of the CD8(+) T cell response to infection. *Immunity* 26(6):827-841.
  - 632 12. Butz EA & Bevan MJ (1998) Massive expansion of antigen-specific CD8+ T cells during an acute virus infection. *Immunity* 8(2):167-175.
  - 636 13. Frahm N, *et al.* (2012) Human adenovirus-specific T cells modulate HIV-specific T cell responses to an Ad5-vectored HIV-1 vaccine. *J Clin Invest* 122(1):359-367.
  - 638 14. Borysiewicz LK, Morris S, Page JD, & Sissons JG (1983) Human cytomegalovirus-specific cytotoxic T lymphocytes: requirements for in vitro generation and specificity. *Eur J Immunol* 13(10):804-809.
  - 641 15. McLaughlin-Taylor E, *et al.* (1994) Identification of the major late human cytomegalovirus matrix protein pp65 as a target antigen for CD8+ virus-specific cytotoxic T lymphocytes. *J Med Virol* 43(1):103-110.
  - 644 16. Walter EA, *et al.* (1995) Reconstitution of cellular immunity against cytomegalovirus in recipients of allogeneic bone marrow by transfer of T-cell clones from the donor. *N Engl J Med* 333(16):1038-1044.
  - 647 17. Khan N, Cobbold M, Keenan R, & Moss PA (2002) Comparative analysis of CD8+ T cell responses against human cytomegalovirus proteins pp65 and immediate early 1 shows similarities in precursor frequency, oligoclonality, and phenotype. *J Infect Dis* 185(8):1025-1034.
  - 650

- 651 18. Sylwester AW, *et al.* (2005) Broadly targeted human cytomegalovirus-specific CD4+ and  
652 CD8+ T cells dominate the memory compartments of exposed subjects. *J Exp Med*  
653 202(5):673-685.
- 654 19. Jackson SE, Mason GM, Okecha G, Sissons JG, & Wills MR (2014) Diverse specificities,  
655 phenotypes, and antiviral activities of cytomegalovirus-specific CD8+ T cells. *J Virol*  
656 88(18):10894-10908.
- 657 20. McSweeney PA, *et al.* (2001) Hematopoietic cell transplantation in older patients with  
658 hematologic malignancies: replacing high-dose cytotoxic therapy with graft-versus-  
659 tumor effects. *Blood* 97(11):3390-3400.
- 660 21. Slavin S, *et al.* (1998) Nonmyeloablative stem cell transplantation and cell therapy as an  
661 alternative to conventional bone marrow transplantation with lethal cytoreduction for  
662 the treatment of malignant and nonmalignant hematologic diseases. *Blood* 91(3):756-  
663 763.
- 664 22. Gyurkocza B & Sandmaier BM (2014) Conditioning regimens for hematopoietic cell  
665 transplantation: one size does not fit all. *Blood* 124(3):344-353.
- 666 23. Cannon MJ, Schmid DS, & Hyde TB (2010) Review of cytomegalovirus seroprevalence  
667 and demographic characteristics associated with infection. *Rev Med Virol* 20(4):202-213.
- 668 24. Zamora D, *et al.* (2021) Cytomegalovirus-specific T-cell reconstitution following  
669 letermovir prophylaxis after hematopoietic cell transplantation. *Blood* 138(1):34-43.
- 670 25. Dash P, *et al.* (2017) Quantifiable predictive features define epitope-specific T cell  
671 receptor repertoires. *Nature* 547(7661):89-93.
- 672 26. Islam S, *et al.* (2011) Characterization of the single-cell transcriptional landscape by  
673 highly multiplex RNA-seq. *Genome Res* 21(7):1160-1167.
- 674 27. Ramsköld D, *et al.* (2012) Full-length mRNA-Seq from single-cell levels of RNA and  
675 individual circulating tumor cells. *Nat Biotechnol* 30(8):777-782.
- 676 28. Hashimshony T, Wagner F, Sher N, & Yanai I (2012) CEL-Seq: single-cell RNA-Seq by  
677 multiplexed linear amplification. *Cell Rep* 2(3):666-673.
- 678 29. Martin PJ, *et al.* (2020) Recipient and donor genetic variants associated with mortality  
679 after allogeneic hematopoietic cell transplantation. *Blood Adv* 4(14):3224-3233.
- 680 30. Becht E, *et al.* (2018) Dimensionality reduction for visualizing single-cell data using  
681 UMAP. *Nat Biotechnol*.
- 682 31. Aran D, *et al.* (2019) Reference-based analysis of lung single-cell sequencing reveals a  
683 transitional profibrotic macrophage. *Nat Immunol* 20(2):163-172.
- 684 32. Shugay M, *et al.* (2018) VDJdb: a curated database of T-cell receptor sequences with  
685 known antigen specificity. *Nucleic Acids Res* 46(D1):D419-D427.
- 686 33. Wolf M, *et al.* (2007) Activation-induced expression of CD137 permits detection,  
687 isolation, and expansion of the full repertoire of CD8+ T cells responding to antigen  
688 without requiring knowledge of epitope specificities. *Blood* 110(1):201-210.
- 689 34. Prlic M, Hernandez-Hoyos G, & Bevan MJ (2006) Duration of the initial TCR stimulus  
690 controls the magnitude but not functionality of the CD8+ T cell response. *J Exp Med*  
691 203(9):2135-2143.
- 692 35. Kaech SM & Ahmed R (2001) Memory CD8+ T cell differentiation: initial antigen  
693 encounter triggers a developmental program in naive cells. *Nat Immunol* 2(5):415-422.

- 694 36. Neuenhahn M, *et al.* (2006) CD8alpha+ dendritic cells are required for efficient entry of  
695 *Listeria monocytogenes* into the spleen. *Immunity* 25(4):619-630.
- 696 37. Cukalac T, *et al.* (2014) Reproducible selection of high avidity CD8+ T-cell clones  
697 following secondary acute virus infection. *Proc Natl Acad Sci U S A* 111(4):1485-1490.
- 698 38. Ibegbu CC, *et al.* (2005) Expression of killer cell lectin-like receptor G1 on antigen-  
699 specific human CD8+ T lymphocytes during active, latent, and resolved infection and its  
700 relation with CD57. *J Immunol* 174(10):6088-6094.
- 701 39. Prlic M, Sacks JA, & Bevan MJ (2012) Dissociating markers of senescence and protective  
702 ability in memory T cells. *PLoS One* 7(3):e32576.
- 703 40. Cossarizza A, *et al.* (2019) Guidelines for the use of flow cytometry and cell sorting in  
704 immunological studies (second edition). *Eur J Immunol* 49(10):1457-1973.
- 705 41. Butler A, Hoffman P, Smibert P, Papalexi E, & Satija R (2018) Integrating single-cell  
706 transcriptomic data across different conditions, technologies, and species. *Nature*  
707 *biotechnology* 36(5):411-420.
- 708 42. Finak G, *et al.* (2015) MAST: a flexible statistical framework for assessing transcriptional  
709 changes and characterizing heterogeneity in single-cell RNA sequencing data. *Genome*  
710 *biology* 16(1):278.
- 711 43. Korsunsky I, *et al.* (2019) Fast, sensitive and accurate integration of single-cell data with  
712 Harmony. *Nat Methods* 16(12):1289-1296.
- 713 44. Heaton H, *et al.* (2020) Souporecell: robust clustering of single-cell RNA-seq data by  
714 genotype without reference genotypes. *Nat Methods* 17(6):615-620.
- 715 45. Schattgen SA, *et al.* (2021) Integrating T cell receptor sequences and transcriptional  
716 profiles by clonotype neighbor graph analysis (CoNGA). *Nat Biotechnol.*
- 717 46. Edgar R, Domrachev M, & Lash AE (2002) Gene Expression Omnibus: NCBI gene  
718 expression and hybridization array data repository. *Nucleic Acids Res* 30(1):207-210.
- 719

|   | Recipient      |                |                |                |                | Sex    | Donor          |                |                |                |                | Sex    |
|---|----------------|----------------|----------------|----------------|----------------|--------|----------------|----------------|----------------|----------------|----------------|--------|
|   | CMV serostatus | HLA-A Allele 1 | HLA-A Allele 2 | HLA-B Allele 1 | HLA-B Allele 2 |        | CMV serostatus | HLA-A Allele 1 | HLA-A Allele 2 | HLA-B Allele 1 | HLA-B Allele 2 |        |
| 1 | Positive       | *02:01         | *24:02         | *35:TDS        | *49:01         | Male   | Negative       | *02:01         | *24:02         | *35:TDS        | *49:01         | Female |
| 2 | Positive       | *02:01         | *24:02         | *35:TDS        | *49:01         | Male   | Negative       | *02:01         | *24:02         | *35:TDS        | *49:01         | Female |
| 3 | Positive       | *02:GMDC       | *25:AH         | *18:GPXC       | *27:GPXM       | Female | Negative       | *02:GMDC       | *25:AH         | *18:GPXM       | *27:GPXM       | Female |
| 4 | Positive       | *02:01         | *03:01         | *44:HTH        | *35:TDS        | Female | Negative       | *02:01         | *03:01         | *44:HTH        | *35:TDS        | Male   |

**Figure 1**

bioRxiv preprint doi: <https://doi.org/10.1101/2021.09.14.458942>; this version posted September 15, 2021. The copyright holder for this preprint (which was not certified by peer review) is the author/funder, who has granted bioRxiv a license to display the preprint in perpetuity. It is made available under aCC-BY-ND 4.0 International license.

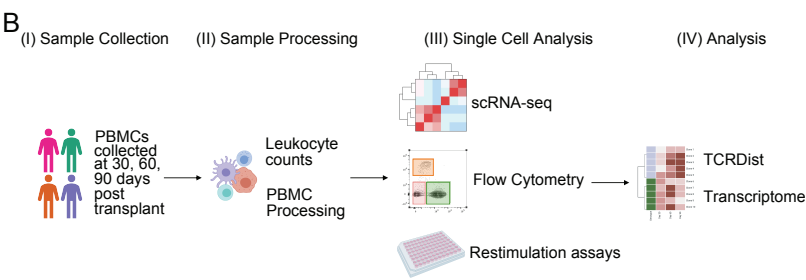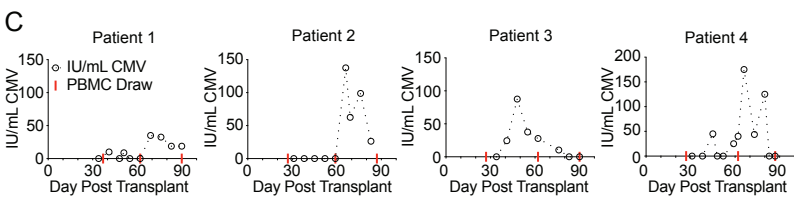

**Figure 2**

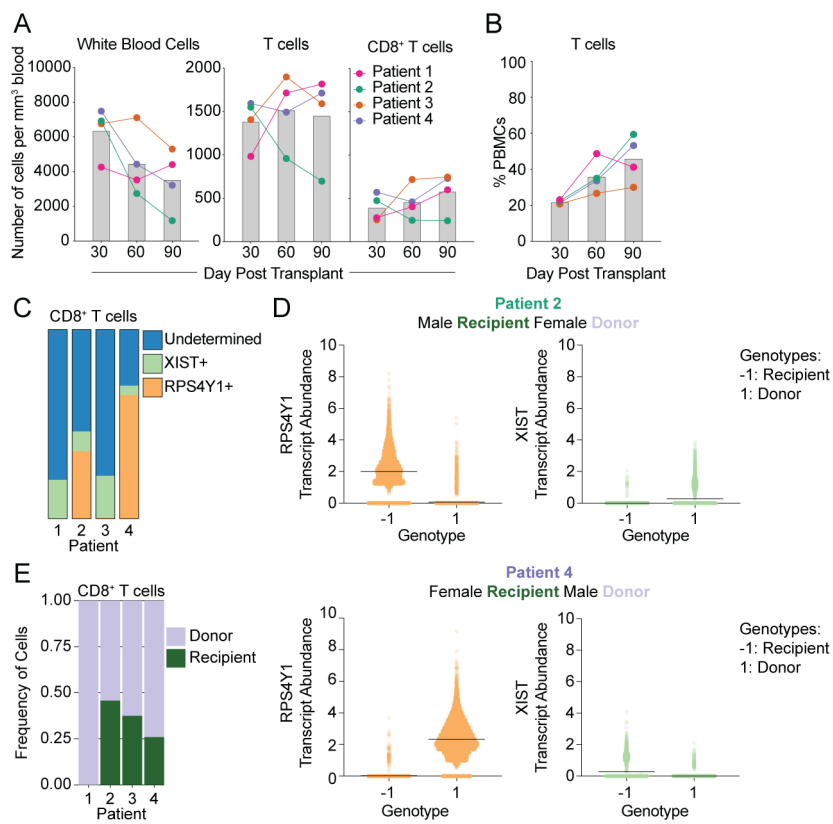



**Figure 3**

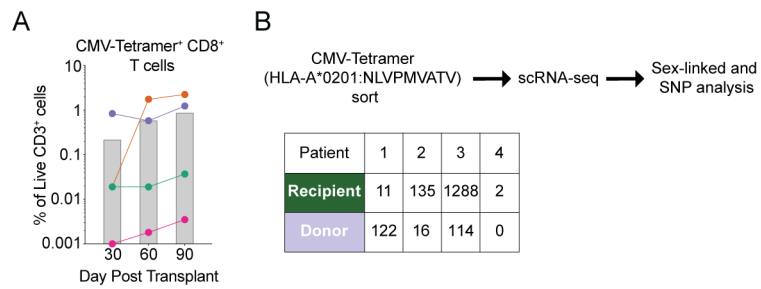

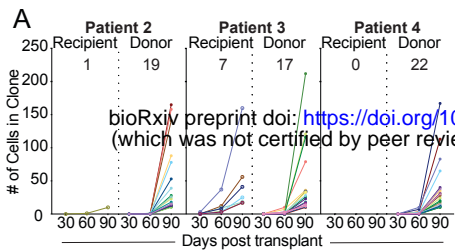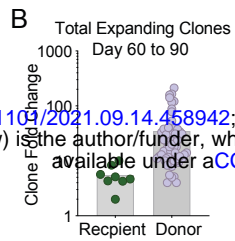

bioRxiv preprint doi: <https://doi.org/10.1101/2021.09.14.458942>; this version posted September 15, 2021. The copyright holder for this preprint (which was not certified by peer review) is the author/funder, who has granted bioRxiv a license to display the preprint in perpetuity. It is made available under aCC-BY-ND 4.0 International license.

**Figure 4**

**C** Calculated absolute number of cells at day 90 in expanding clones

|           |                                                        |
|-----------|--------------------------------------------------------|
| Patient 2 | $1 \times 10^5$ - $1.65 \times 10^6$ cells per clone   |
| Patient 3 | $4.2 \times 10^5$ - $8.86 \times 10^6$ cells per clone |
| Patient 4 | $2.7 \times 10^5$ - $4.57 \times 10^6$ cells per clone |

**Figure 5**

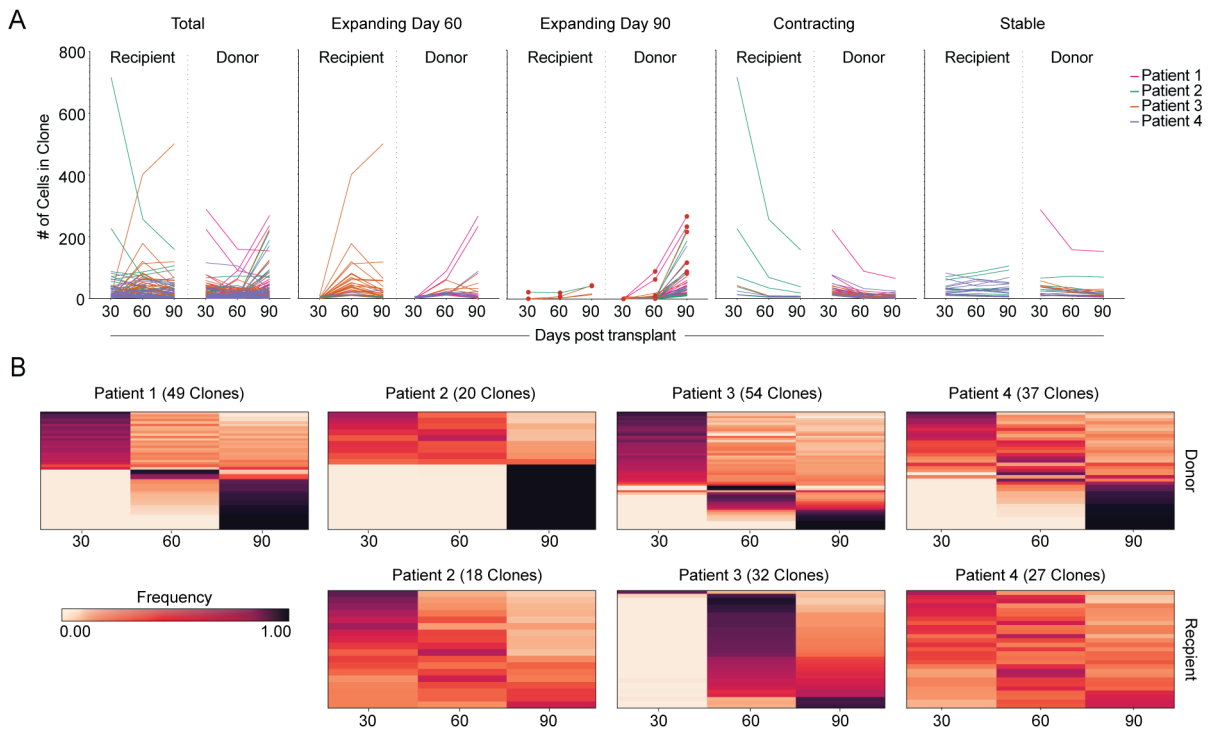

**Figure 6**

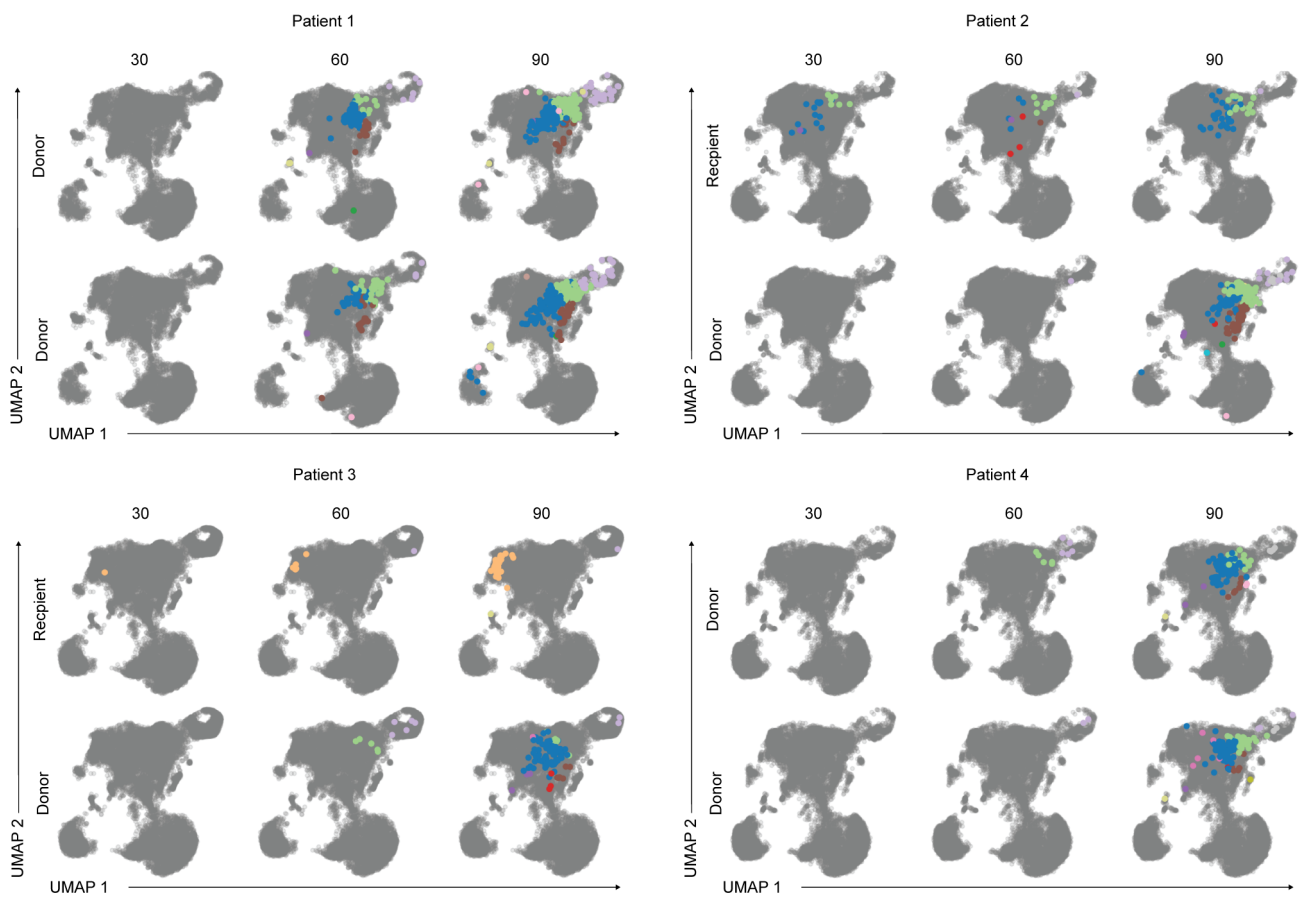

**Figure 7**

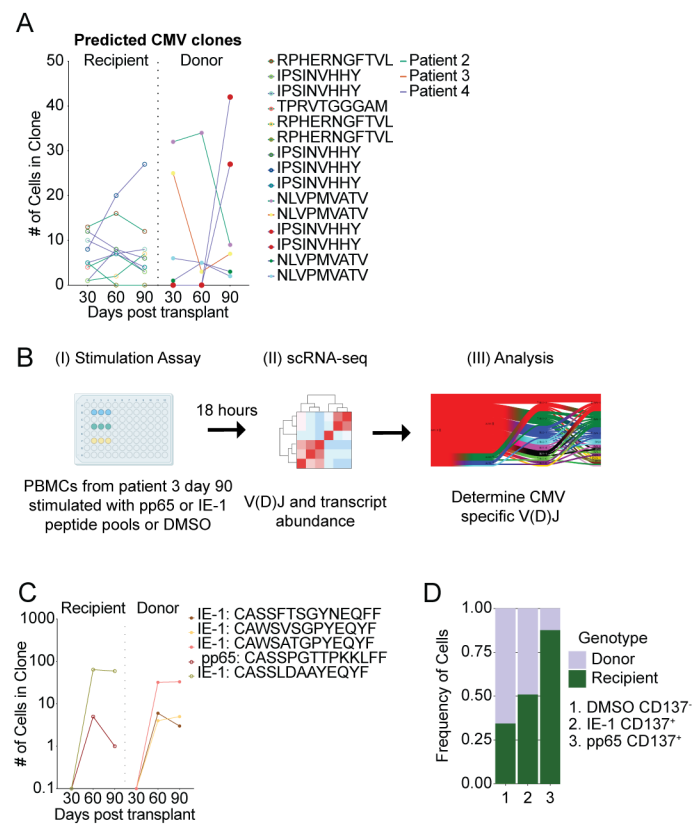

**Figure 8**

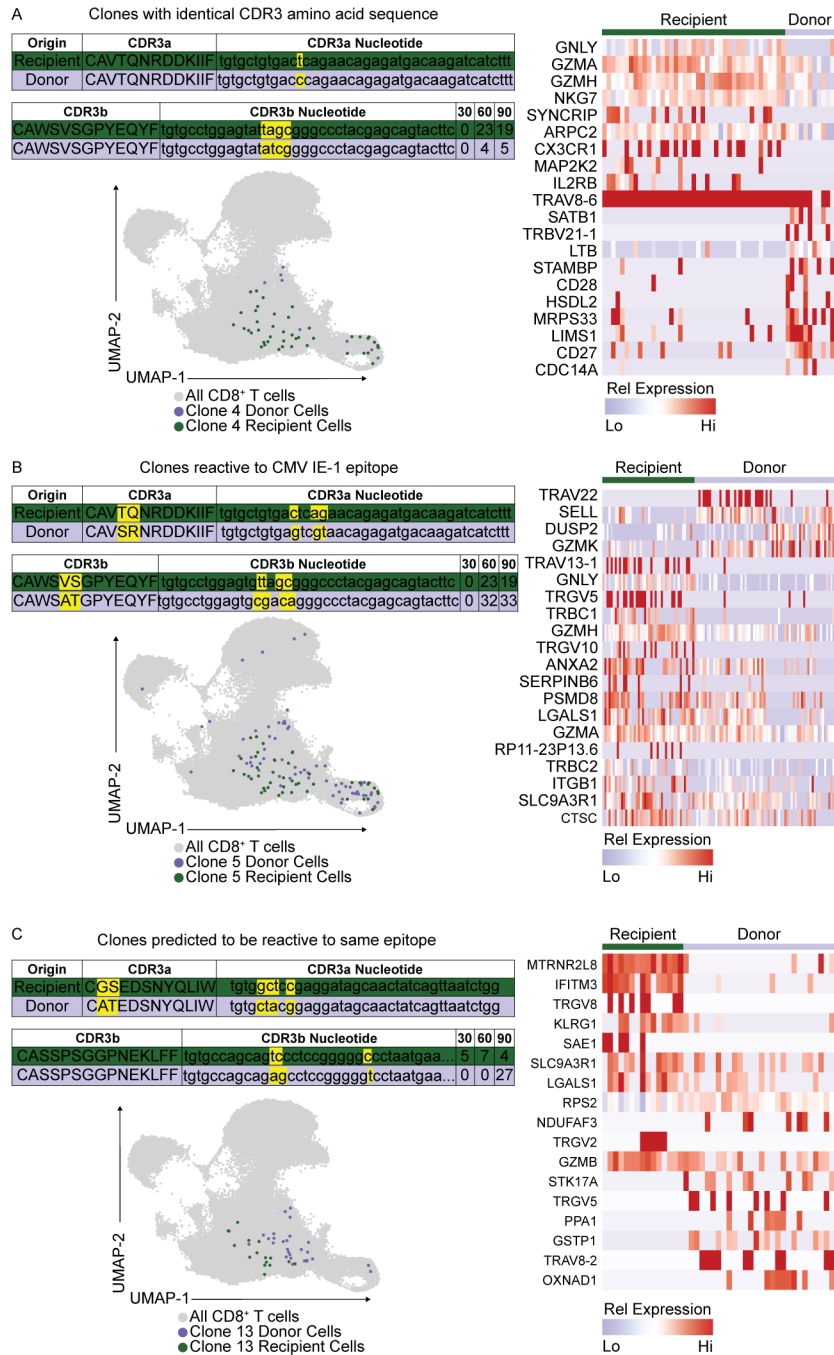

## Supplemental Figure 1

Supplemental to Figure 3

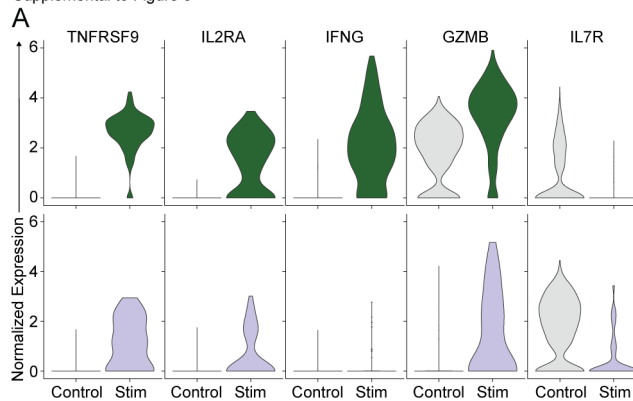

**B**

| Peptide pool | Cell count (Stim) | Cell Count (ex vivo) | CDR3b             | Literature match |
|--------------|-------------------|----------------------|-------------------|------------------|
| pp65         | 70                | 0                    | CASSRQTGAAYGYTF   | pp65_NLV         |
|              | 5                 | 0                    | CASSRQTGAAYGYTF   | pp65_NLV         |
|              | 3                 | 0                    | CASSQEEGPGHQPHF   | pp65_NLV         |
|              | 2                 | 0                    | CASSADWKRETQYF    | N/A              |
|              | 2                 | 0                    | CASSVNEQFF        | pp65_NLV         |
| IE-1         | 18                | 123                  | CASSLDAAYEQYF     | N/A              |
|              | 5                 | 9                    | CASSFTSGYNEQFF    | N/A              |
|              | 3                 | 65                   | CAWSATGPYEQYF     | N/A              |
|              | 2                 | 33                   | CATSTGRRVGGQETQYF | N/A              |
|              | 2                 | 9                    | CAWSVSGPYEQYF     | N/A              |

Supplemental Figure 1. Additional analysis of peptide-pool stimulated CD137+ CD8+ T cells compared to unstimulated CD8 T cells (control). (A) The gene expression profile of recipient-derived (green) and donor-derived (purple) CD8 T cells compared to CD8 T cells from the DMSO (no stim) control group (grey). (B) CD137+ sorted T cells were analyzed by 5' scRNA-seq to determine TCR gene usage and CDR3 sequences. Cell counts for each clone are shown from the peptide pool stimulation experiment (stim) and compared to the direct ex vivo sequencing data (shown in Fig. 3).
